# Supplementary material for: Responses of forest carbon and water coupling to thinning treatments from leaf to stand scales in a young montane pine forest
Source: Research Square preprint supplement (doi:10.21203/rs.3.rs-32975/v2), 2020-10-28
Supplement: Supplementary file 1 [file 02c6a99fdb813129a25a317f.xlsx]

## Sheet: DBH data
June-08-2016	2020-08-03	September-14-2016	(Corrected) November-04-2016	Average(November and september)			June-09-2017	2017-07-07	August-10-2017 (mm)	September-09-2017 (mm)	October-09-2017			Tree NO.		BAI-2016	BAI-2017		BAI (Aug to Sep in 2016)	BAI (Sep to Oct in 2016)		BAI (June to July in 2017)	BAI (July to Aug)	BAI (Aug to Sep in 2017)	BAI (Sep to Oct in 2017)
72.8	86.4	76.8	74.6954	75.7477			79.12	81.39	82.46	82.28	83.29			1		343.731	531.641		-1229.88	-126.013		286.021	137.626	-23.2778	131.272
52.4	54.2	56	55.73	55.865			58.62	59.07	60.1	60.06	60.54			2		294.484	179.598		155.713	-11.8549		41.574	96.3549	-3.77302	45.4421
52	55	54.5	54.1712	54.3356			58.22	59.55	59.88	59.43	60.37			3		194.961	200.15		-42.9788	-14.0457		122.958	30.9383	-42.1463	88.4004
68.1	72.7	69.4	67.6808	68.5404			72.17	71.65	74.02	73.39	75.62			4		47.2385	400.252		-368.11	-93.0803		-58.7073	271.012	-72.9016	260.849
42.6	42.8	53.2	45.338	49.269			45.7	46.83	47.66	47	47.69			5		480.949	145.889		783.744	-316.202		82.0787	61.565	-49.0433	51.2888
56.2	59.8	59	58.6744	58.8372			62.77	63.48	63.77	62.55	64.11			6		238.15	133.465		-74.6064	-15.0594		70.3654	28.9685	-120.977	155.108
49.5	52.6	52.2	49.4082	50.8041			51.48	50.69	53.6	52.85	53.38			7		102.683	156.399		-32.9072	-112.87		-63.3607	238.235	-62.6724	44.197
71.8	73.8	75	68.4602	71.7301			73.08	75.47	73.59	74.56	74.45			8		-7.87571	158.661		140.17	-376.637		278.702	-219.983	112.809	-12.867
40.5	52	48	48.802	48.401			49.67	50.96	51.4	50.36	51.32			9		551.389	130.807		-314	30.3456		101.903	35.3551	-83.0769	76.626
			70.5	70.5										10
42.7	42.1	41.7	44.5586	43.1293			43.11	43.59	42.71	42.53	43.49			11		28.9245	25.8328		-26.3132	95.1785		32.6686	-59.616	-12.0444	64.8247
58.7	60.3	59.3	59.2806	59.2903			61.31	60.69	60.64	60.18	62.93			12		54.675	157.996		-93.886	-0.903006		-59.3774	-4.7622	-43.6281	265.764
73.9	74.6	71.6	68.4602	70.0301			73.14	72.34	73.59	72.84	73.78			13		-437.241	73.8126		-344.301	-174.541		-91.3614	143.194	-86.2107	108.191
52.3	54	53	52.9588	52.9794			53.95	54.54	54.57	54.56	55.11			14		56.1486	99.31		-83.995	-1.71379		50.2471	2.56954	-0.85667	47.35
42	43.1	42.4	44.7318	43.5659			44.05	44.94	44.33	44.35	45.1365			15		105.18	76.0653		-46.9823	78.6787		62.1729	-42.7469	1.39228	55.2471
Unit: mm

## Sheet: Growing season
Total BAI-2016 (mm2)	Total days for BAI	Mean daily tree transpiration (g/d)	Total days for tree transpiration	Mean daily BAI	mean Daily tree transpiration (kg/d)	TreeWUE 2016		BAI-2017	total days for BAI	mean daily transpiration (g/d)	mean daily transpiraiton (kg/d)	Total days for transpiration	mean daily BAI (mm/d)	TreeWUE 2017		Tree No.
343.731	122	8385.71	77	2.81747	8.38571	0.335985		531.641	123	7432.14	7.43214	123	4.32228	0.581567		1
294.484	122	2669.83	77	2.4138	2.66983	0.904101		179.598	123	3183.91	3.18391	123	1.46015	0.458601		2
194.961	122	3788.94	77	1.59804	3.78894	0.421764		200.15	123			123	1.62724	#DIV/0!		3
47.2385	122	5894.02	77	0.387201	5.89402	0.0656939		400.252	123	6069.93	6.06993	123	3.25408	0.536099		4
480.949	122	1699.84	77	3.94221	1.69984	2.31916		145.889	123	1425.38	1.42538	123	1.18609	0.832123		5
238.15	122	4164.25	77	1.95205	4.16425	0.468764		133.465	123	3168.49	3.16849	123	1.08508	0.342461		6
102.683	122	3830.85	77	0.841665	3.83085	0.219707		156.399	123	2746.6	2.7466	123	1.27153	0.462948		7
-7.87571	122	4638.25	77	-0.064555	4.63825	-0.013918		158.661	123	3065.26	3.06526	123	1.28993	0.420821		8
551.389	122	1653.28	77	4.51958	1.65328	2.73371		130.807	123	1407.62	1.40762	123	1.06347	0.755512		9
	122	3945.18	77		3.94518				123	3470.9	3.4709	123				10
28.9245	122	374.342	77	0.237086	0.374342	0.633341		25.8328	123	306.511	0.306511	123	0.210023	0.685204		11
54.675	122	1545.07	77	0.448156	1.54507	0.290056		157.996	123	1135.92	1.13592	123	1.28452	1.13082		12
-437.241	122	3520.36	77	-3.58394	3.52036	-1.01806		73.8126	123	2421.67	2.42167	123	0.600103	0.247805		13
56.1486	122	1749.76	77	0.460234	1.74976	0.263027		99.31	123	1177.64	1.17764	123	0.807399	0.68561		14
105.18	122	2888.96	77	0.862134	2.88896	0.298424		76.0653	123	2866.55	2.86655	123	0.618417	0.215736		15
	June 08 to Oct 06		sap flow data start at July 22						June 09 to oct 09

## Sheet: Monthly calculation
2016							2017
Aug 03 to Sep 14							June 06 to July 07			June 09 to July 07
Tree NO.	BAI (mm)	mean daily BAI (mm2/d)	Mean daily transpiration (g/d)	Mean daily transpiration (kg/d)	WUE		Tree NO.	BAI (mm)	mean daily BAI (mm2/d)	Mean daily transpiration (g/d)	Mean daily transpiration (kg/d)	WUE
1	-1229.88	-28.6017	9361.17	9.36117	-3.05536		1	286.021	8.93815	6939.17	6.93917	1.28807
2	155.713	3.62122	2623.68	2.62368	1.38021		2	41.574	1.29919	3392.07	3.39207	0.383007
3	-42.9788	-0.999506	4028.03	4.02803	-0.248138		3	122.958	3.84243
4	-368.11	-8.5607	6205.22	6.20522	-1.3796		4	-58.7073	-1.8346	5630.34	5.63034	-0.325842
5	783.744	18.2266	1823.07	1.82307	9.99775		5	82.0787	2.56496	1810.42	1.81042	1.41677
6	-74.6064	-1.73503	4555.44	4.55544	-0.380871		6	70.3654	2.19892	4473.07	4.47307	0.491591
7	-32.9072	-0.765284	4296.74	4.29674	-0.178108		7	-63.3607	-1.98002	3520.29	3.52029	-0.56246
8	140.17	3.25976	5234.73	5.23473	0.622717		8	278.702	8.70944	4291.53	4.29153	2.02945
9	-314	-7.30233	1837.92	1.83792	-3.97316		9	101.903	3.18447	2138.95	2.13895	1.4888
10			4327.6	4.3276			10			3931.37	3.93137
11	-26.3132	-0.611935	421.802	0.421802	-1.45076		11	32.6686	1.02089	436.617	0.436617	2.33819
12	-93.886	-2.1834	1530.95	1.53095	-1.42617		12	-59.3774	-1.85554	1667.54	1.66754	-1.11274
13	-344.301	-8.007	3740.63	3.74063	-2.14055		13	-91.3614	-2.85505	3697.68	3.69768	-0.772117
14	-83.995	-1.95337	1763.06	1.76306	-1.10795		14	50.2471	1.57022	2235.82	2.23582	0.702304
15	-46.9823	-1.09261	1973.88	1.97388	-0.553533		15	62.1729	1.9429	3474.79	3.47479	0.559143
Sep 14 to Nov 04							July 07 to Aug 10
Tree NO.	Sep 14 to Nov 04		Sep 15 to Oct 06				Tree NO.
1	-250.287	-4.81322	5096.5	5.0965	-0.944416		1	137.626	3.93217	10093.8	10.0938	0.389561
2	-23.6812	-0.455407	2075.27	2.07527	-0.219445		2	96.3549	2.753	4092.54	4.09254	0.672686
3	-28.0489	-0.539402	2255.55	2.25555	-0.239145		3	30.9383	0.883953
4	-185	-3.5577	3919.54	3.91954	-0.907682		4	271.012	7.74319	7009.43	7.00943	1.10468
5	-608.144	-11.6951	836.874	0.836874	-13.9747		5	61.565	1.759	2064.43	2.06443	0.85205
6	-30.0771	-0.578406	2195.11	2.19511	-0.263497		6	28.9685	0.82767	4604.24	4.60424	0.179762
7	-222.681	-4.28232	2093.82	2.09382	-2.04522		7	238.235	6.80671	4144.23	4.14423	1.64245
8	-736.488	-14.1632	2363.41	2.36341	-5.99271		8	-219.983	-6.28522	4128.48	4.12848	-1.52241
9	60.9436	1.17199	927.869	0.927869	1.2631		9	35.3551	1.01015	2158.62	2.15862	0.46796
10			2658.63	2.65863			10			4070.27	4.07027
11	193.564	3.72239	195.02	0.19502	19.0872		11	-59.616	-1.70332	392.248	0.392248	-4.34245
12	-1.80586	-0.0347282	893.255	0.893255	-0.0388782		12	-4.7622	-0.136063	1262.91	1.26291	-0.107738
13	-345.212	-6.6387	2056.57	2.05657	-3.22804		13	143.194	4.09125	2932.84	2.93284	1.39498
14	-3.42692	-0.0659023	1144.04	1.14404	-0.0576047		14	2.56954	0.0734154	1459.61	1.45961	0.050298
15	159.492	3.06714	2356.88	2.35688	1.30136		15	-42.7469	-1.22134	1715.05	1.71505	-0.712131
							Aug 10 to Sep 09
							Tree NO.
							1	-23.2778	-0.750896	7216.07	7.21607	-0.104059
							2	-3.77302	-0.12171	2393.94	2.39394	-0.0508411
							3	-42.1463	-1.35956
							4	-72.9016	-2.35167	4728.12	4.72812	-0.497379
							5	-49.0433	-1.58204	1046.86	1.04686	-1.51122
							6	-120.977	-3.90247	2152.13	2.15213	-1.81331
							7	-62.6724	-2.02169	1963.2	1.9632	-1.0298
							8	112.809	3.63899	2234.97	2.23497	1.62821
							9	-83.0769	-2.6799	638.77	0.63877	-4.19541
							10			2784.64	2.78464
							11	-12.0444	-0.388529	198.17	0.19817	-1.96058
							12	-43.6281	-1.40736	846.325	0.846325	-1.6629
							13	-86.2107	-2.78099	1719.99	1.71999	-1.61686
							14	-0.85667	-0.0276345	559.354	0.559354	-0.0494043
							15	1.39228	0.0449121	1522.98	1.52298	0.0294896
							Sep 09 to Oct 09
							Tree NO.
							1	131.272	4.23459	4263.07	4.26307	0.993319
							2	45.4421	1.46587	2742.88	2.74288	0.534428
							3	88.4004	2.85163
							4	260.849	8.4145	6771.92	6.77192	1.24256
							5	51.2888	1.65448	707.431	0.707431	2.33871
							6	155.108	5.00348	1296.56	1.29656	3.85905
							7	44.197	1.42571	1198.12	1.19812	1.18996
							8	-12.867	-0.415065	1505.19	1.50519	-0.275756
							9	76.626	2.47181	618.384	0.618384	3.9972
							10			3032.74	3.03274
							11	64.8247	2.09112	191.915	0.191915	10.8961
							12	265.764	8.57302	767.702	0.767702	11.1671
							13	108.191	3.49003	1310.56	1.31056	2.66301
							14	47.35	1.52742	453.441	0.453441	3.36851
							15	55.2471	1.78217	4927.2	4.9272	0.3617

## Sheet: Responses to VPD and solar 
Tree-level WUE (mm2 kg-1)	Year	Period	Treatment	Mean daily air temperature of the period (⁰C)	Mean daily VPD of the period (kPa)	Mean daily Solar Radiation of the period (W/m2)	Mean daily Soil VWC at 20 cm of the period	Mean daily Soil VWC at 40 cm of the period
5.68898	2016	Aug 03 to Sep 14	T2	11.4665	0.574189	195.318	0.179511	0.135736
0.622717	2016	Aug 03 to Sep 14	T1	10.8714	0.477727	145.58	0.177303	0.156177
1.2631	2016	Sep 14 to Nov 04	T1	3.90713	0.158446	74.0288	0.192118	0.164215
10.1943	2016	Sep 14 to Nov 04	NT	4.34733	0.165179	35.6458	0.17761	0.142767
1.02928	2017	June 06 to July 07	T2	11.7054	0.659035	239.317	0.227117	0.18077
1.33661	2017	June 06 to July 07	T1	11.0995	0.55267	178.678	0.24997	0.236717
1.19988	2017	June 06 to July 07	NT	11.1524	0.542561	72.8516	0.18772	0.154479
0.754745	2017	July 07 to Aug 10	T2	16.1059	1.08418	270.134	0.146676	0.133717
0.763392	2017	July 07 to Aug 10	T1	15.3895	0.954165	185.457	0.139683	0.154799
0.722639	2017	July 07 to Aug 10	NT	15.9738	1.01738	74.5327	0.0897372	0.0647038
1.62821	2017	Aug 10 to Sep 09	T1	15.1974	0.909061	135.294	0.0632489	0.0846475
0.0294896	2017	Aug 10 to Sep 09	NT	15.7156	0.968265	61.1722	0.0591171	0.0277972
1.27725	2017	Sep 09 to Oct 09	T2	5.66765	0.333651	129.896	0.117617	0.0779709
3.0154	2017	Sep 09 to Oct 09	T1	5.16156	0.289178	94.0973	0.0701278	0.0724421
5.69128	2017	Sep 09 to Oct 09	NT	5.29758	0.292026	38.9476	0.122008	0.0778904
