# Supplementary material for: Responses of forest carbon and water coupling to thinning treatments from leaf to stand scales in a young montane pine forest
Source: Research Square preprint supplement (doi:10.21203/rs.3.rs-32975/v2), 2020-10-28
Supplement: Supplementary file 2 [file 2f59ac47cb4602cf50e7b377.xlsx]

## Sheet: Accumulated NPP
	Aboveground biomass estimation												ANPP-2016	ANPP-2017
B1C	2016June	2016Aug	2016Sep	2016Nov(corrected)	2016 Oct	2017June	2017July	2017Aug	2017Sep	2017Oct		B1C	451.018	122.469
Mean DBH (mm)	45.6	46.5	46.4	47.0103	46.7052	47.6307	47.4831	47.1931	47.132	47.9185		B2C	-516.714	148.75
Mean Basal diameter (mm)	53.398	54.6957	54.5516	55.4316	54.9916	56.3261	56.1134	55.6952	55.6071	56.7411		B3C	152.86	200.692
Aboveground biomass (g)	2771.73	2907.4	2892.16	2985.76	2938.77	3082.4	3059.27	3014.07	3004.59	3127.76		B1T1	177.285	81.2449
Stand aboveground biomass (kg/m2)	7483.67	7849.97	7808.84	8061.54	7934.69	8322.49	8260.04	8138	8112.4	8444.96		B2T1	81.419	55.0248
monthly ANPP		366.296	-41.1295	252.704	125.852	260.941	-62.4443	-122.044	-25.6027	332.56		B3T1	14.9611	69.807
												B1T2	47.7706	36.742
B2C	2016June	2016Aug	2016Sep	2016Nov(corrected)		2017June	2017July	2017Aug	2017Sep	2017Oct		B2T2	42.1674	30.7761
Mean DBH (mm)	43.9422	42.7578	41.8044	43.3385	42.5715	43.2536	43.6653	43.5636	43.1276	43.646		B3T2	-7.22826	25.2722
Mean Basal diameter (mm)	51.0075	49.2996	47.9249	50.137	49.031	50.0145	50.6083	50.4615	49.8328	50.5804
Aboveground biomass (g)	2530.28	2364.48	2235.09	2445.07	2338.91	2433.2	2491.02	2476.67	2415.64	2488.29
Stand aboveground biomass (kg/m2)	6831.76	6384.09	6034.73	6601.69	6315.05	6569.64	6725.76	6687	6522.23	6718.39
monthly ANPP		-447.672	-349.358	566.962	280.316	-32.0571	156.12	-38.7575	-164.77	196.156
B3C	2016June	2016Aug	2016Sep	2016Nov		2017June	2017July	2017Aug	2017Sep	2017Oct
Mean DBH (mm)	41.5067	41.4911	42.4244	41.4372	41.9308	41.7918	42.5856	41.8684	42.0776	42.3429
Mean Basal diameter (mm)	47.4956	47.4731	48.819	47.3953	48.1071	47.9067	49.0513	48.0172	48.3188	48.7014
Aboveground biomass (g)	2195.41	2193.35	2318.82	2186.2	2252.03	2233.39	2340.83	2243.66	2271.78	2307.72
Stand aboveground biomass (kg/m2)	5927.61	5922.04	6260.82	5902.74	6080.47	6030.16	6320.25	6057.88	6133.82	6230.85
monthly ANPP		-5.56952	338.781	-358.08	-180.352	127.412	290.097	-262.374	75.9373	97.0314
B1T1	2016June	2016Aug	2016Sep	2016Nov		2017June	2017July	2017Aug	2017Sep	2017Oct
Mean DBH (mm)	39.6733	42.6667	42.0222	43.325	42.6736	43.7636	44.5082	44.3251	44.2104	45.0162
Mean Basal diameter (mm)	44.852	49.1682	48.239	50.1176	49.1783	50.7499	51.8237	51.5596	51.3943	52.5562
Aboveground biomass (g)	1958.94	2351.95	2264.32	2443.19	2352.91	2504.91	2611.49	2585.08	2568.61	2685.46
Stand aboveground biomass (kg/m2)	881.524	1058.38	1018.95	1099.43	1058.81	1127.21	1175.17	1163.28	1155.87	1208.46
monthly ANPP		176.856	-39.4336	80.4881	39.8636	27.7769	47.9582	-11.8849	-7.4119	52.5835
B2T1	2016June	2016Aug	2016Sep	2016Nov		2017June	2017July	2017Aug	2017Sep	2017Oct
Mean DBH (mm)	46.5644	48.3356	47.42	48.0418	47.7309	48.7771	48.6451	48.9124	49.1024	49.5269
Mean Basal diameter (mm)	54.7887	57.3425	56.0224	56.919	56.4707	57.9793	57.7889	58.1744	58.4484	59.0604
Aboveground biomass (g)	2917.23	3194.08	3049.41	3147.31	3098.17	3265.04	3243.75	3286.95	3317.83	3387.32
Stand aboveground biomass (kg/m2)	1312.76	1437.34	1372.23	1416.29	1394.17	1469.27	1459.69	1479.13	1493.02	1524.29
monthly ANPP		124.581	-65.102	44.0537	21.9403	52.9824	-9.58304	19.4405	13.8946	31.2728
B3T1	2016June	2016Aug	2016Sep	2016Nov		2017June	2017July	2017Aug	2017Sep	2017Oct
Mean DBH (mm)	44.3178	44.6422	45.2844	43.8119	44.5482	44.4402	45.0284	44.536	44.7329	45.4996
Mean Basal diameter (mm)	51.5491	52.0169	52.943	50.8196	51.8813	51.7256	52.5738	51.8637	52.1476	53.2531
Aboveground biomass (g)	2584.02	2630.9	2724.93	2511.77	2617.27	2601.66	2687.25	2615.51	2644.07	2756.79
Stand aboveground biomass (kg/m2)	1162.81	1183.9	1226.22	1130.3	1177.77	1170.75	1209.26	1176.98	1189.83	1240.56
monthly ANPP		21.0951	42.3131	-95.9224	-48.447	40.4533	38.5138	-32.285	12.856	50.7222
B1T2	2016June	2016Aug	2016Sep	2016Nov		2017June	2017July	2017Aug	2017Sep	2017Oct
Mean DBH (mm)	50.0378	53.3333	52.6756	52.4604	52.568	53.8011	54.5769	55.0416	53.9567	55.6051
Mean Basal diameter (mm)	59.7971	64.5491	63.6007	63.2904	63.4455	65.2237	66.3423	67.0123	65.448	67.825
Aboveground biomass (g)	3471.92	4042.58	3925.23	3887.21	3906.2	4127.08	4269.13	4355.37	4155.37	4461.1
Stand aboveground biomass (kg/m2)	381.911	444.684	431.775	427.594	429.682	453.979	469.605	479.09	457.091	490.721
monthly ANPP		62.7726	-12.9085	-4.18185	-2.09345	26.3853	15.6259	9.4854	-21.9992	33.6298
B2T2	2016June	2016Aug	2016Sep	2016Nov		2017June	2017July	2017Aug	2017Sep	2017Oct
Mean DBH (mm)	52.7778	55.1651	55.4091	54.366	54.8876	56.3545	57.0834	57.3093	57.0518	57.7925
Mean Basal diameter (mm)	63.7481	67.1905	67.5423	66.0383	66.7903	68.9056	69.9566	70.2824	69.9111	70.9791
Aboveground biomass (g)	3943.36	4378.44	4424.18	4230.29	4326.69	4603.66	4744.45	4788.52	4738.3	4883.44
Stand aboveground biomass (kg/m2)	433.769	481.628	486.66	465.332	475.936	506.403	521.89	526.737	521.213	537.179
monthly ANPP		47.8593	5.03129	-21.3277	-10.7233	41.0707	15.4868	4.84719	-5.52324	15.9654
B3T2	2016June	2016Aug	2016Sep	2016Nov		2017June	2017July	2017Aug	2017Sep	2017Oct
Mean DBH (mm)	49.74	49.7489	49.6911	48.9906	49.3409	50.4991	51.3178	51.37	51.4282	51.8418
Mean Basal diameter (mm)	59.3677	59.3805	59.2972	58.2871	58.7921	60.4623	61.6428	61.7181	61.8021	62.3984
Aboveground biomass (g)	3422.49	3423.96	3414.4	3299.63	3356.77	3549.21	3688.44	3697.41	3707.43	3778.95
Stand aboveground biomass (kg/m2)	376.473	376.635	375.584	362.96	369.245	390.413	405.728	406.715	407.817	415.685
monthly ANPP		0.161765	-1.05085	-12.6247	-6.33917	27.4531	15.3155	0.98691	1.10171	7.86814

## Sheet: LAI
	LAI												Mean LAI-2016	Mean LAI-2017
B1C	2016June	2016Aug	2016Sep	2016Nov(corrected)	2016-10-01	2017June	2017July	2017Aug	2017Sep	2017Oct		B1C	1.13766	1.22181
Mean DBH (mm)	45.6	46.5	46.4	47.0103	46.7052	47.6307	47.4831	47.1931	47.132	47.9185		B2C	0.904445	0.946541
Mean Basal diameter (mm)	53.398	54.6957	54.5516	55.4316	54.9916	56.3261	56.1134	55.6952	55.6071	56.7411		B3C	0.847404	0.865018
LA	1.00795	1.06621	1.05964	1.10008	1.07975	1.14207	1.132	1.11235	1.10824	1.16185		B1T1	#DIV/0!	0.167618
LAI	1.08858	1.1515	1.14441	1.18808	1.16613	1.23343	1.22256	1.20134	1.1969	1.2548		B2T1	42.769	0.22276
												B3T1	49.3158	0.17295
												B1T2	0.837449	0.0737982
B2C	2016June	2016Aug	2016Sep	2016Nov(corrected)		2017June	2017July	2017Aug	2017Sep	2017Oct		B2T2	0.904445	0.083594
Mean DBH (mm)	43.9422	42.7578	41.8044	43.3385	42.5715	43.2536	43.6653	43.5636	43.1276	43.646		B3T2	#DIV/0!	0.0619799
Mean Basal diameter (mm)	51.0075	49.2996	47.9249	50.137	49.031	50.0145	50.6083	50.4615	49.8328	50.5804
LA	0.905512	0.836149	0.782608	0.869762	0.825526	0.864798	0.889013	0.882992	0.857464	0.887868
LAI	0.977953	0.903041	0.845216	0.939343	0.891568	0.933981	0.960134	0.953632	0.926061	0.958897
B3C	2016June	2016Aug	2016Sep	2016Nov		2017June	2017July	2017Aug	2017Sep	2017Oct
Mean DBH (mm)	41.5067	41.4911	42.4244	41.4372	41.9308	41.7918	42.5856	41.8684	42.0776	42.3429
Mean Basal diameter (mm)	47.4956	47.4731	48.819	47.3953	48.1071	47.9067	49.0513	48.0172	48.3188	48.7014
LA	0.766298	0.765452	0.817197	0.762519	0.789587	0.78191	0.826326	0.786139	0.797739	0.812598
LAI	0.827602	0.826688	0.882573	0.823521	0.852754	0.844463	0.892432	0.84903	0.861558	0.877606
B1T1	2016June	2016Aug	2016Sep	2016Nov		2017June	2017July	2017Aug	2017Sep	2017Oct
Mean DBH (mm)	39.6733	42.6667	42.0222	43.325	42.6736	43.7636	44.5082	44.3251	44.2104	45.0162
Mean Basal diameter (mm)	44.852	49.1682	48.239	50.1176	49.1783	50.7499	51.8237	51.5596	51.3943	52.5562
LA	0.670191	0.830944	0.79466	0.868973	0.831341	0.894846	0.93978	0.928614	0.92166	0.971158
LAI	0.120634	0.14957	0.143039	0.156415	0.149641	0.161072	0.16916	0.16715	0.165899	0.174808
B2T1	2016June	2016Aug	2016Sep	2016Nov		2017June	2017July	2017Aug	2017Sep	2017Oct
Mean DBH (mm)	46.5644	48.3356	47.42	48.0418	47.7309	48.7771	48.6451	48.9124	49.1024	49.5269
Mean Basal diameter (mm)	54.7887	57.3425	56.0224	56.919	56.4707	57.9793	57.7889	58.1744	58.4484	59.0604
LA	1.07045	1.19087	1.1277	1.17039	1.14894	1.22205	1.21268	1.23169	1.24531	1.27604
LAI	0.192681	0.214357	0.202987	0.210671	0.206809	0.219968	0.218282	0.221705	0.224156	0.229687
B3T1	2016June	2016Aug	2016Sep	2016Nov		2017June	2017July	2017Aug	2017Sep	2017Oct
Mean DBH (mm)	44.3178	44.6422	45.2844	43.8119	44.5482	44.4402	45.0284	44.536	44.7329	45.4996
Mean Basal diameter (mm)	51.5491	52.0169	52.943	50.8196	51.8813	51.7256	52.5738	51.8637	52.1476	53.2531
LA	0.928168	0.947999	0.987964	0.897726	0.942227	0.935624	0.97192	0.94148	0.953584	1.00156
LAI	0.16707	0.17064	0.177834	0.161591	0.169601	0.168412	0.174946	0.169466	0.171645	0.180281
B1T2	2016June	2016Aug	2016Sep	2016Nov		2017June	2017July	2017Aug	2017Sep	2017Oct
Mean DBH (mm)	50.0378	53.3333	52.6756	52.4604	52.568	53.8011	54.5769	55.0416	53.9567	55.6051
Mean Basal diameter (mm)	59.7971	64.5491	63.6007	63.2904	63.4455	65.2237	66.3423	67.0123	65.448	67.825
LA	1.31359	1.57099	1.51751	1.50024	1.50886	1.60967	1.67502	1.71487	1.62266	1.76393
LAI	0.0577981	0.0691236	0.0667702	0.0660104	0.0663897	0.0708257	0.0737009	0.0754544	0.071397	0.077613
B2T2	2016June	2016Aug	2016Sep	2016Nov		2017June	2017July	2017Aug	2017Sep	2017Oct
Mean DBH (mm)	52.7778	55.1651	55.4091	54.366	54.8876	56.3545	57.0834	57.3093	57.0518	57.7925
Mean Basal diameter (mm)	63.7481	67.1905	67.5423	66.0383	66.7903	68.9056	69.9566	70.2824	69.9111	70.9791
LA	1.52575	1.72556	1.74678	1.65711	1.70161	1.8304	1.8964	1.91713	1.89351	1.96189
LAI	0.0671329	0.0759247	0.0768582	0.072913	0.0748707	0.0805376	0.0834415	0.0843535	0.0833144	0.0863233
B3T2	2016June	2016Aug	2016Sep	2016Nov		2017June	2017July	2017Aug	2017Sep	2017Oct
Mean DBH (mm)	49.74	49.7489	49.6911	48.9906	49.3409	50.4991	51.3178	51.37	51.4282	51.8418
Mean Basal diameter (mm)	59.3677	59.3805	59.2972	58.2871	58.7921	60.4623	61.6428	61.7181	61.8021	62.3984
LA	1.29163	1.29228	1.28804	1.23728	1.26252	1.34804	1.41044	1.41448	1.41898	1.45123
LAI	0.0568316	0.0568604	0.0566739	0.0544405	0.0555507	0.059314	0.0620594	0.0622369	0.0624352	0.063854

## Sheet: Canopy conductance
	Canopy conductance
B1C	2016June	2016Aug	2016Sep	2016Nov(corrected)	2016 Oct	2017June	2017July	2017Aug	2017Sep	2017Oct	Mean-2017
Mean DBH (mm)	45.6	46.5	46.4	47.0103	46.7052	47.6307	47.4831	47.1931	47.132	47.9185	47.4715
Mean Basal diameter (mm)	53.398	54.6957	54.5516	55.4316	54.9916	56.3261	56.1134	55.6952	55.6071	56.7411	56.0966
LA	1.00795	1.06621	1.05964	1.10008	1.07975	1.14207	1.132	1.11235	1.10824	1.16185	1.1312
LAI	1.08858	1.1515	1.14441	1.18808	1.16613	1.23343	1.22256	1.20134	1.1969	1.2548	1.2217
Transpiration （m3/sm2)		2.17715e-05	1.31596e-05	/	1.62203e-05	1.84733e-05	2.08678e-05	9.2767e-06	1.14017e-05	1.08883e-05	1.66571e-05
Mean daily temp (⁰C)		13.97	6.72	1.27	2.91	9.474	15.255	16.145	9.739	2.547	10.632
λ (Latent heat of vaporization of water (MJ/kg)		2.46802	2.48513	2.498	2.49413	2.47863	2.46498	2.46288	2.47801	2.49499	2.4759
ρa(the density of air (kg/m3)	1.225	1.225	1.225	1.225	1.225	1.225	1.225	1.225	1.225	1.225	1.225
Ca (the heat capacity of air, MJ/kgK)	0.001	0.001	0.001	0.001	0.001	0.001	0.001	0.001	0.001	0.001	0.001
Mean daily VPD (kPa)		0.666	0.215	0.076	0.13	0.392	0.908	1.068	0.54	0.227	0.72
ƴ, the psychrometric constant (kPa /K)	0.067	0.067	0.067	0.067	0.067	0.067	0.067	0.067	0.067	0.067	0.067
Mean daily Canopy Conductance (mm/s)		3.8321	7.2696	#VALUE!	14.5958	5.17958	2.53439	0.973952	2.39089	5.21633	2.56433
B2C	2016June	2016Aug	2016Sep	2016Nov(corrected)		2017June	2017July	2017Aug	2017Sep	2017Oct
Mean DBH (mm)	43.9422	42.7578	41.8044	43.3385	42.5715	43.2536	43.6653	43.5636	43.1276	43.646	43.4512
Mean Basal diameter (mm)	51.0075	49.2996	47.9249	50.137	49.031	50.0145	50.6083	50.4615	49.8328	50.5804	50.2995
LA	0.905512	0.836149	0.782608	0.869762	0.825526	0.864798	0.889013	0.882992	0.857464	0.887868	0.876373
LAI	0.977953	0.903041	0.845216	0.939343	0.891568	0.933981	0.960134	0.953632	0.926061	0.958897	0.946483
Transpiration （m3/sm2)		2.77618e-05	1.78179e-05	/	2.12154e-05	1.84733e-05	2.08678e-05	9.2767e-06	1.14017e-05	1.08883e-05	2.15007e-05
Mean daily temp (⁰C)		13.97	6.72	1.27	2.91	9.474	15.255	16.145	9.739	2.547	10.632
λ (Latent heat of vaporization of water (MJ/kg)		2.46802	2.48513	2.498	2.49413	2.47863	2.46498	2.46288	2.47801	2.49499	2.4759
ρa(the density of air (kg/m3)	1.225	1.225	1.225	1.225	1.225	1.225	1.225	1.225	1.225	1.225	1.225
Ca (the heat capacity of air, MJ/kgK)	0.001	0.001	0.001	0.001	0.001	0.001	0.001	0.001	0.001	0.001	0.001
Mean daily VPD (kPa)		0.666	0.215	0.076	0.13	0.392	0.908	1.068	0.54	0.227	0.72
ƴ, the psychrometric constant (kPa /K)	0.067	0.067	0.067	0.067	0.067	0.067	0.067	0.067	0.067	0.067	0.067
Mean daily Canopy Conductance (mm/s)		6.23092	13.3272	#VALUE!	24.9696	6.84023	3.22709	1.22694	3.09014	6.82603	4.27246
B3C	2016June	2016Aug	2016Sep	2016Nov		2017June	2017July	2017Aug	2017Sep	2017Oct
Mean DBH (mm)	41.5067	41.4911	42.4244	41.4372	41.9308	41.7918	42.5856	41.8684	42.0776	42.3429	42.1332
Mean Basal diameter (mm)	47.4956	47.4731	48.819	47.3953	48.1071	47.9067	49.0513	48.0172	48.3188	48.7014	48.3991
LA	0.766298	0.765452	0.817197	0.762519	0.789587	0.78191	0.826326	0.786139	0.797739	0.812598	0.800845
LAI	0.827602	0.826688	0.882573	0.823521	0.852754	0.844463	0.892432	0.84903	0.861558	0.877606	0.864912
Transpiration （m3/sm2)		3.03258e-05	1.70637e-05	/	2.21811e-05	1.84733e-05	2.08678e-05	9.2767e-06	1.14017e-05	1.08883e-05	2.35284e-05
Mean daily temp (⁰C)		13.97	6.72	1.27	2.91	9.474	15.255	16.145	9.739	2.547	2.4759
λ (Latent heat of vaporization of water (MJ/kg)		2.46802	2.48513	2.498	2.49413	2.47863	2.46498	2.46288	2.47801	2.49499	2.49515
ρa(the density of air (kg/m3)	1.225	1.225	1.225	1.225	1.225	1.225	1.225	1.225	1.225	1.225	1.225
Ca (the heat capacity of air, MJ/kgK)	0.001	0.001	0.001	0.001	0.001	0.001	0.001	0.001	0.001	0.001	0.001
Mean daily VPD (kPa)		0.666	0.215	0.076	0.076	0.392	0.908	1.068	0.54	0.227	0.72
ƴ, the psychrometric constant (kPa /K)	0.067	0.067	0.067	0.067	0.067	0.067	0.067	0.067	0.067	0.067	0.067
Mean daily Canopy Conductance (mm/s)		7.43505	12.2229	#VALUE!	46.6877	7.56535	3.4719	1.3781	3.32149	7.45831	5.15613
B1T1	2016June	2016Aug	2016Sep	2016Nov		2017June	2017July	2017Aug	2017Sep	2017Oct
Mean DBH (mm)	39.6733	42.6667	42.0222	43.325	42.6736	43.7636	44.5082	44.3251	44.2104	45.0162	44.3647
Mean Basal diameter (mm)	44.852	49.1682	48.239	50.1176	49.1783	50.7499	51.8237	51.5596	51.3943	52.5562	51.6167
LA	0.670191	0.830944	0.79466	0.868973	0.831341	0.894846	0.93978	0.928614	0.92166	0.971158	0.931022
LAI	0.120634	0.14957	0.143039	0.156415	0.149641	0.161072	0.16916	0.16715	0.165899	0.174808	0.167584
Transpiration （m3/sm2)		8.90887e-06	4.43936e-06	/	2.58952e-06	6.5413e-06	9.37358e-06	4.64315e-06	3.16482e-06	2.63907e-06	4.9229e-06
Mean daily temp (⁰C)		13.7	6.68	1.25	2.79	9.513	14.739	15.561	9.486	2.524	10.3646
λ (Latent heat of vaporization of water (MJ/kg)		2.46865	2.48523	2.49805	2.49441	2.47854	2.4662	2.46426	2.4786	2.49504	2.47653
ρa(the density of air (kg/m3)	1.225	1.225	1.225	1.225	1.225	1.225	1.225	1.225	1.225	1.225	1.225
Ca (the heat capacity of air, MJ/kgK)	0.001	0.001	0.001	0.001	0.001	0.001	0.001	0.001	0.001	0.001	0.001
Mean daily VPD (kPa)		0.65	0.226	0.083	0.14	0.414	0.858	1.001	0.519	0.235	0.69
ƴ, the psychrometric constant (kPa /K)	0.067	0.067	0.067	0.067	0.067	0.067	0.067	0.067	0.067	0.067	0.067
Mean daily Canopy Conductance (mm/s)		12.3727	18.6665	#VALUE!	16.8635	13.2977	8.71138	3.74021	4.98293	8.76672	5.76663
B2T1	2016June	2016Aug	2016Sep	2016Nov	2016 Oct	2017June	2017July	2017Aug	2017Sep	2017Oct
Mean DBH (mm)	46.5644	48.3356	47.42	48.0418	47.7309	48.7771	48.6451	48.9124	49.1024	49.5269	48.9928
Mean Basal diameter (mm)	54.7887	57.3425	56.0224	56.919	56.4707	57.9793	57.7889	58.1744	58.4484	59.0604	58.2903
LA	1.07045	1.19087	1.1277	1.17039	1.14894	1.22205	1.21268	1.23169	1.24531	1.27604	1.23744
LAI	0.192681	0.214357	0.202987	0.210671	0.206809	0.219968	0.218282	0.221705	0.224156	0.229687	0.22274
Transpiration （m3/sm2)		6.21625e-06	3.12828e-06	/	1.87371e-06	6.5413e-06	9.37358e-06	4.64315e-06	3.16482e-06	2.63907e-06	3.70388e-06
Mean daily temp (⁰C)		13.7	6.68	1.25	2.79	9.513	14.739	15.561	9.486	2.524	10.3646
λ (Latent heat of vaporization of water (MJ/kg)		2.46865	2.48523	2.49805	2.49441	2.47854	2.4662	2.46426	2.4786	2.49504	2.47653
ρa(the density of air (kg/m3)	1.225	1.225	1.225	1.225	1.225	1.225	1.225	1.225	1.225	1.225	1.225
Ca (the heat capacity of air, MJ/kgK)	0.001	0.001	0.001	0.001	0.001	0.001	0.001	0.001	0.001	0.001	0.001
Mean daily VPD (kPa)		0.65	0.226	0.083	0.14	0.414	0.858	1.001	0.519	0.235	0.69
ƴ, the psychrometric constant (kPa /K)	0.067	0.067	0.067	0.067	0.067	0.067	0.067	0.067	0.067	0.067	0.067
Mean daily Canopy Conductance (mm/s)		6.02387	9.26903	#VALUE!	8.82904	9.73729	6.75098	2.81987	3.68789	6.67211	3.26432
B3T1	2016June	2016Aug	2016Sep	2016Nov		2017June	2017July	2017Aug	2017Sep	2017Oct
Mean DBH (mm)	44.3178	44.6422	45.2844	43.8119	44.5482	44.4402	45.0284	44.536	44.7329	45.4996	44.8474
Mean Basal diameter (mm)	51.5491	52.0169	52.943	50.8196	51.8813	51.7256	52.5738	51.8637	52.1476	53.2531	52.3128
LA	0.928168	0.947999	0.987964	0.897726	0.942227	0.935624	0.97192	0.94148	0.953584	1.00156	0.960666
LAI	0.16707	0.17064	0.177834	0.161591	0.169601	0.168412	0.174946	0.169466	0.171645	0.180281	0.17292
Transpiration （m3/sm2)		7.80884e-06	3.57075e-06	/	2.28478e-06	6.5413e-06	9.37358e-06	4.64315e-06	3.16482e-06	2.63907e-06	4.77099e-06
Mean daily temp (⁰C)		13.7	6.68	1.25	2.79	9.513	14.739	15.561	9.486	2.524	10.3646
λ (Latent heat of vaporization of water (MJ/kg)		2.46865	2.48523	2.49805	2.49441	2.47854	2.4662	2.46426	2.4786	2.49504	2.47653
ρa(the density of air (kg/m3)	1.225	1.225	1.225	1.225	1.225	1.225	1.225	1.225	1.225	1.225	1.225
Ca (the heat capacity of air, MJ/kgK)	0.001	0.001	0.001	0.001	0.001	0.001	0.001	0.001	0.001	0.001	0.001
Mean daily VPD (kPa)		0.65	0.226	0.083	0.14	0.414	0.858	1.001	0.519	0.235	0.69
ƴ, the psychrometric constant (kPa /K)	0.067	0.067	0.067	0.067	0.067	0.067	0.067	0.067	0.067	0.067	0.067
Mean daily Canopy Conductance (mm/s)		9.50586	12.0765	#VALUE!	13.1279	12.7182	8.4233	3.6891	4.81611	8.50059	5.41623
B1T2	2016June	2016Aug	2016Sep	2016Nov		2017June	2017July	2017Aug	2017Sep	2017Oct
Mean DBH (mm)	50.0378	53.3333	52.6756	52.4604	52.568	53.8011	54.5769	55.0416	53.9567	55.6051	54.5963
Mean Basal diameter (mm)	59.7971	64.5491	63.6007	63.2904	63.4455	65.2237	66.3423	67.0123	65.448	67.825	66.3702
LA	1.31359	1.57099	1.51751	1.50024	1.50886	1.60967	1.67502	1.71487	1.62266	1.76393	1.67667
LAI	0.0577981	0.0691236	0.0667702	0.0660104	0.0663897	0.0708257	0.0737009	0.0754544	0.071397	0.077613	0.0737735
Transpiration （m3/sm2)		1.30344e-06	8.08466e-07	/	5.67636e-07	3.02994e-06	4.69655e-06	3.33329e-06	1.97132e-06	1.89474e-06	9.94033e-07
Mean daily temp (⁰C)		14.49	7.08	1.43	3.26	9.947	15.544	16.207	9.887	2.863	10.8896
λ (Latent heat of vaporization of water (MJ/kg)		2.46679	2.48428	2.49762	2.4933	2.47752	2.4643	2.46274	2.47766	2.49424	2.47529
ρa(the density of air (kg/m3)	1.225	1.225	1.225	1.225	1.225	1.225	1.225	1.225	1.225	1.225	1.225
Ca (the heat capacity of air, MJ/kgK)	0.001	0.001	0.001	0.001	0.001	0.001	0.001	0.001	0.001	0.001	0.001
Mean daily VPD (kPa)		0.786	0.277	0.098	0.17	0.487	1.001	1.113	0.578	0.277	0.78
ƴ, the psychrometric constant (kPa /K)	0.067	0.067	0.067	0.067	0.067	0.067	0.067	0.067	0.067	0.067	0.067
Mean daily Canopy Conductance (mm/s)		3.23676	5.93936	#VALUE!	6.85858	11.9034	8.58034	5.34626	6.47337	12.023	2.33868
B2T2	2016June	2016Aug	2016Sep	2016Nov		2017June	2017July	2017Aug	2017Sep	2017Oct
Mean DBH (mm)	52.7778	55.1651	55.4091	54.366	54.8876	56.3545	57.0834	57.3093	57.0518	57.7925	57.1183
Mean Basal diameter (mm)	63.7481	67.1905	67.5423	66.0383	66.7903	68.9056	69.9566	70.2824	69.9111	70.9791	70.0069
LA	1.52575	1.72556	1.74678	1.65711	1.70161	1.8304	1.8964	1.91713	1.89351	1.96189	1.89959
LAI	0.0671329	0.0759247	0.0768582	0.072913	0.0748707	0.0805376	0.0834415	0.0843535	0.0833144	0.0863233	0.083582
Transpiration （m3/sm2)		1.18668e-06	7.02352e-07	\	5.03337e-07	3.02994e-06	4.69655e-06	3.33329e-06	1.97132e-06	1.89474e-06	8.77382e-07
Mean daily temp (⁰C)		14.49	7.08	1.43	3.26	9.947	15.544	16.207	9.887	2.863	10.8896
λ (Latent heat of vaporization of water (MJ/kg)		2.46679	2.48428	2.49762	2.4933	2.47752	2.4643	2.46274	2.47766	2.49424	2.47529
ρa(the density of air (kg/m3)	1.225	1.225	1.225	1.225	1.225	1.225	1.225	1.225	1.225	1.225	1.225
Ca (the heat capacity of air, MJ/kgK)	0.001	0.001	0.001	0.001	0.001	0.001	0.001	0.001	0.001	0.001	0.001
Mean daily VPD (kPa)		0.786	0.277	0.098	0.17	0.487	1.001	1.113	0.578	0.277	0.78
ƴ, the psychrometric constant (kPa /K)	0.067	0.067	0.067	0.067	0.067	0.067	0.067	0.067	0.067	0.067	0.067
Mean daily Canopy Conductance (mm/s)		2.68286	4.48254	#VALUE!	5.39277	10.468	7.5787	4.78224	5.54741	10.8098	1.82199
B3T2	2016June	2016Aug	2016Sep	2016Nov		2017June	2017July	2017Aug	2017Sep	2017Oct
Mean DBH (mm)	49.74	49.7489	49.6911	48.9906	49.3409	50.4991	51.3178	51.37	51.4282	51.8418	51.2914
Mean Basal diameter (mm)	59.3677	59.3805	59.2972	58.2871	58.7921	60.4623	61.6428	61.7181	61.8021	62.3984	61.6047
LA	1.29163	1.29228	1.28804	1.23728	1.26252	1.34804	1.41044	1.41448	1.41898	1.45123	1.4084
LAI	0.0568316	0.0568604	0.0566739	0.0544405	0.0555507	0.059314	0.0620594	0.0622369	0.0624352	0.063854	0.0619697
Transpiration （m3/sm2)		1.58455e-06	9.52494e-07	\	6.78392e-07	3.02994e-06	4.69655e-06	3.33329e-06	1.97132e-06	1.89474e-06	1.18337e-06
Mean daily temp (⁰C)		14.49	7.08	1.43	3.26	9.947	15.544	16.207	9.887	2.863	2.47529
λ (Latent heat of vaporization of water (MJ/kg)		2.46679	2.48428	2.49762	2.4933	2.47752	2.4643	2.46274	2.47766	2.49424	2.49516
ρa(the density of air (kg/m3)	1.225	1.225	1.225	1.225	1.225	1.225	1.225	1.225	1.225	1.225	1.225
Ca (the heat capacity of air, MJ/kgK)	0.001	0.001	0.001	0.001	0.001	0.001	0.001	0.001	0.001	0.001	0.001
Mean daily VPD (kPa)		0.786	0.277	0.098	0.17	0.487	1.001	1.113	0.578	0.277	0.78
ƴ, the psychrometric constant (kPa /K)	0.067	0.067	0.067	0.067	0.067	0.067	0.067	0.067	0.067	0.067	0.067
Mean daily Canopy Conductance (mm/s)		4.78349	8.24403	#VALUE!	9.79616	14.2136	10.1899	6.48167	7.40254	14.6137	3.34106

## Sheet: Growing season WUE and WUEi
					Whole growing season
						ANPP-2016	Tstand	mean daily Stand WUE	ANPP-2017	Tstand	StandWUE
					B1C	451.018	4.79	0.771789	122.469	4.07	0.244641
					B2C	-516.714	4.79	-0.884209	148.75	4.07	0.297137
					B3C	152.86	4.79	0.261576	200.692	4.07	0.400894
					B1T1	177.285	1.21	1.20096	81.2449	0.99	0.6672
					B2T1	81.419	1.21	0.551544	55.0248	0.99	0.451875
					B3T1	14.9611	1.21	0.101349	69.807	0.99	0.573269
					B1T2	47.7706	0.36	1.08767	36.742	0.36	0.829765
					B2T2	42.1674	0.36	0.960095	30.7761	0.36	0.695034
					B3T2	-7.22826	0.36	-0.164578	25.2722	0.36	0.570736
						Whole growign season
						ANPP-2017	Mean Gs-2017	Mean daily StandWUEi
					B1C	122.469	2.56433	0.418937	(123 days)
					B2C	148.75	4.27246	0.305403
					B3C	200.692	5.15613	0.341429
					B1T1	81.2449	5.76663	0.123586
					B2T1	55.0248	3.26432	0.147863
					B3T1	69.807	5.41623	0.113057
					B1T2	36.742	2.33868	0.137812
					B2T2	30.7761	1.82199	0.148171
					B3T2	25.2722	3.34106	0.066352

## Sheet: responses to microclimtes
Period of interest	Stand level WUE ((kg m-3)	StandWUEi ((kg m-3)	Mean daily Temperature (⁰C)	Mean daily VPD (kPa)	Mean daily solar radiation (W/m2)	Soil VWC at 20 cm	Soil VWC at 40 cm	Treatment	Year
Aug 03rd to Sep 14th in 2016	2.17958	1.87365	11.0721	0.484179	63.9282	0.12585	0.108428	NT	2016
Sep 14th to Oct 06th in 2016	2.57422		5.81313	0.203511	39.0775	0.162101	0.13001	NT	2016
June 09th to July 07th in 2017	1.73315		11.1524	0.542561	72.8516	0.18772	0.154479	NT	2017
July 07th to Aug 10th in 2017			15.9738	1.01738	74.5327	0.0897372	0.0647038	NT	2017
Aug 10th to Sep 09th in 2017	1.03664	2.0533	15.7156	0.968265	61.1722	0.0591171	0.0277972	NT	2017
Sep 09th to Oct 09th in 2017	1.56382		5.29758	0.292026	38.9476	0.122008	0.0778904	NT	2017
Aug 03rd to Sep 14th in 2016	0.853619	0.146755	10.8714	0.477727	145.58	0.177303	0.156177	T1	2016
Sep 14th to Oct 06th in 2016	1.91925		5.77912	0.215309	90.6158	0.186366	0.162068	T1	2016
June 09th to July 07th in 2017	1.25104		11.0995	0.55267	178.678	0.24997	0.236717	T1	2017
July 07th to Aug 10th in 2017	0.378006	0.0787642	15.3895	0.954165	185.457	0.139683	0.154799	T1	2017
Aug 10th to Sep 09th in 2017	0.595941	0.126292	15.1974	0.909061	135.294	0.0632489	0.0846475	T1	2017
Sep 09th to Oct 09th in 2017	3.23662		5.16156	0.289178	94.0973	0.0701278	0.0724421	T1	2017
Aug 03rd to Sep 14th in 2016	0.366945	0.0454914	11.4665	0.574189	195.318	0.179511	0.135736	T2	2016
Sep 14th to Oct 18th in 2016			4.24412	0.197471	98.4048	0.20291	0.15162	T2	2017
June 09th to July 07th in 2017	1.47813		11.7054	0.659035	239.317	0.227117	0.18077	T2	2017
July 07th to Aug 10th in 2017	0.317391	0.0187551	16.1059	1.08418	270.134	0.146676	0.133717	T2	2017
Aug 10th to Sep 09th in 2017	0.0998283	0.00641876	15.7777	1.00529	199.823	0.0865407	0.0905818	T2	2017
Sep 09th to Oct 09th in 2017	2.8377		5.66765	0.333651	129.896	0.117617	0.0779709	T2	2017
